# Supplementary material for: Zinc-doped SnO2 nanocrystals as photoanode materials for highly efficient dye-sensitized solar cells
Source: Royal Society of Chemistry journal article supplement (doi:10.1039/c5ta01176k), 2015-01-01
Supplement: c5ta01176k1.pdf [file c5ta01176k1.pdf]

## Electronic Supplementary Information

# Zinc-doped SnO<sub>2</sub> nanocrystals as photoanode materials for highly efficient dye-sensitized solar cells

**Xiaochao Li,<sup>a</sup> Qingjiang Yu,<sup>\*a</sup> Cuiling Yu,<sup>\*b</sup> Yewu Huang,<sup>a</sup> Renzhi Li,<sup>c</sup> Jinzhong Wang,<sup>\*a</sup> Fengyun Guo,<sup>a</sup> Yong Zhang,<sup>a</sup> Shiyong Gao<sup>a</sup> and Liancheng Zhao<sup>a</sup>**

<sup>a</sup> Department of Opto-electronic Information Science, School of Materials Science and Engineering, Harbin Institute of Technology, Harbin, 150001, China. Fax: +86 0451 86418328; Tel: +86 0451 86418745; E-mail: qingjiang.yu@hit.edu.cn; jinzhong\_wang@hit.edu.cn

<sup>b</sup> Department of Physics, Harbin Institute of Technology, Harbin, 150001, China. Fax: +86 0451 86418328; Tel: +86 0451 86418745; E-mail: cuiling.yu@hit.edu.cn

<sup>c</sup> State Key Laboratory of Polymer Physics and Chemistry, Changchun Institute of Applied Chemistry, Chinese Academy of Sciences, Changchun, 130022, China

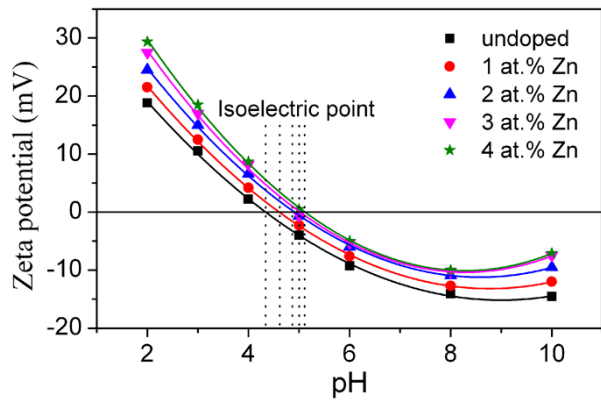

**Fig. S1** The pH-dependent zeta-potential of the undoped and Zn-doped SnO<sub>2</sub> nanoparticles.

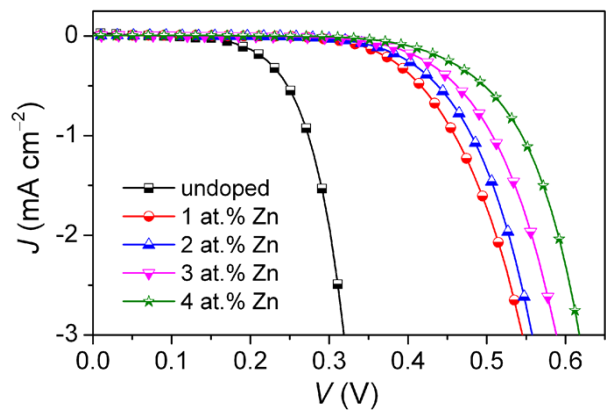

**Fig. S2**  $J$ - $V$  characteristics of the undoped and Zn-doped  $\text{SnO}_2$  based cells measured in the dark.

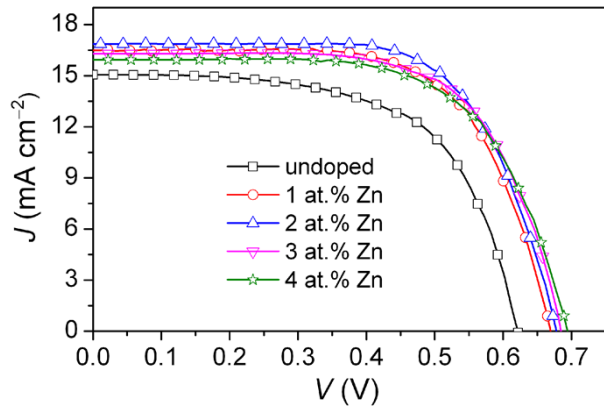

**Fig. S3**  $J$ - $V$  characteristics of the undoped and Zn-doped SnO<sub>2</sub> based cells with the TiCl<sub>4</sub> treatment under an irradiance of 100 mW cm<sup>-2</sup> simulated AM1.5G sunlight.

**Table S1** Comparison of the photovoltaic performance of the DSCs based on SnO<sub>2</sub> photoanodes with various morphologies.

| Morphology                               | Synthetic method or manufacturer | Diameter        | Film thickness | $\eta$ (%) (no surface treatment) | $\eta$ (%) (after surface treatment)              | Reference |
|------------------------------------------|----------------------------------|-----------------|----------------|-----------------------------------|---------------------------------------------------|-----------|
| SnO <sub>2</sub> nanoparticles           | Alfa Aesar                       | 15 nm           | 4 $\mu$ m      | 0.76                              | Al <sub>2</sub> O <sub>3</sub> /3.7               | S1        |
| SnO <sub>2</sub> nanoparticles           | Alfa Aesar                       | 15-140 nm       | 8 $\mu$ m      | 1.2                               | Zn(CH <sub>3</sub> COO) <sub>2</sub> /5.1         | S2        |
| SnO <sub>2</sub> nanoparticles           | Alfa Aesar                       | 15 nm           | –              | 1.7                               | CaCO <sub>3</sub> /5.4                            | S3        |
| SnO <sub>2</sub> nanopowder              | Sigma-Aldrich                    | <100 nm         | 8 $\mu$ m      | 3.65                              | MgO/6.40                                          | S4        |
| SnO <sub>2</sub> nanoparticles           | Alfa Aesar                       | 3-5nm           | 10 $\mu$ m     | 1.74                              | MgO/7.21                                          | S5        |
| SnO <sub>2</sub> nanowires               | Reactive vapor transport         | 20-200 nm       | 25-30 $\mu$ m  | 2.1                               | TiCl <sub>4</sub> /4.1                            | S6        |
| SnO <sub>2</sub> nanofibers              | –                                | 200 nm          | 8.7 $\mu$ m    | –                                 | TiCl <sub>4</sub> /4.63                           | S7        |
| SnO <sub>2</sub> nanotubes               | Electrospinning                  | 110 nm          | 13 $\mu$ m     | 0.99                              | TiCl <sub>4</sub> /5.11                           | S8        |
| SnO <sub>2</sub> nanoflowers             | Hydrothermal                     | 1 $\mu$ m       | –              | 1.05                              | TiCl <sub>4</sub> /5.60                           | S9        |
| SnO <sub>2</sub> hollow microspheres     | Hydrothermal                     | 1-2 $\mu$ m     | 10 $\mu$ m     | 1.4                               | TiCl <sub>4</sub> /5.65                           | S10       |
| SnO <sub>2</sub> hollow nanospheres      | Hydrothermal                     | 200 nm          | –              | 0.86                              | TiCl <sub>4</sub> /6.02                           | S11       |
| Mesoporous SnO <sub>2</sub> agglomerates | Molten salt method               | 200-600 nm      | 8 $\mu$ m      | 3.05                              | TiCl <sub>4</sub> /6.23                           | S12       |
| SnO <sub>2</sub> octahedra               | Sonochemical                     | 0.5-1.8 $\mu$ m | 13.2 $\mu$ m   | –                                 | TiCl <sub>4</sub> /6.8                            | S13       |
| Mg-doped SnO <sub>2</sub> nanoparticles  | Hydrothermal                     | 100 nm          | –              | 2.03                              | TiCl <sub>4</sub> /4.15                           | S14       |
| Zn-doped SnO <sub>2</sub> nanoflowers    | Hydrothermal                     | 1 $\mu$ m       | 10 $\mu$ m     | 3.00                              | TiCl <sub>4</sub> /6.78                           | S15       |
| Al-doped SnO <sub>2</sub> nanocrystals   | Hydrothermal                     | 11.6-15.9 nm    | 8 $\mu$ m      | 3.56                              | TiCl <sub>4</sub> /6.91                           | S16       |
| Zn-doped SnO <sub>2</sub> nanocrystals   | Hydrothermal                     | 15 nm           | 8.5 $\mu$ m    | 4.18                              | TiCl <sub>4</sub> /7.70                           | Our work  |
|                                          |                                  |                 | 8.5+5 $\mu$ m  | –                                 | TiCl <sub>4</sub> /8.23 (with a scattering layer) |           |

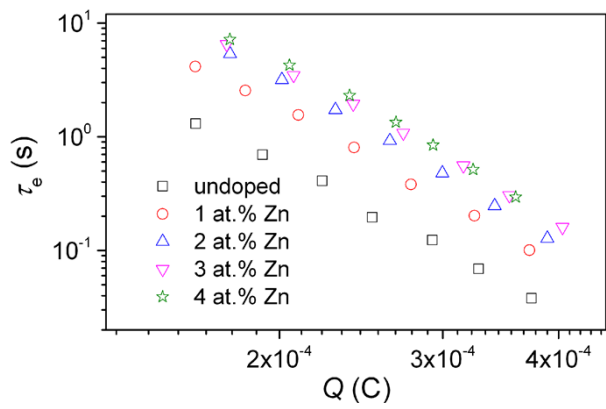

**Fig. S4** Pots of lifetime of photoinjected electrons in the DSCs based on undoped and Zn-doped SnO<sub>2</sub> photoanodes with TiCl<sub>4</sub> treatment as a function of charge.

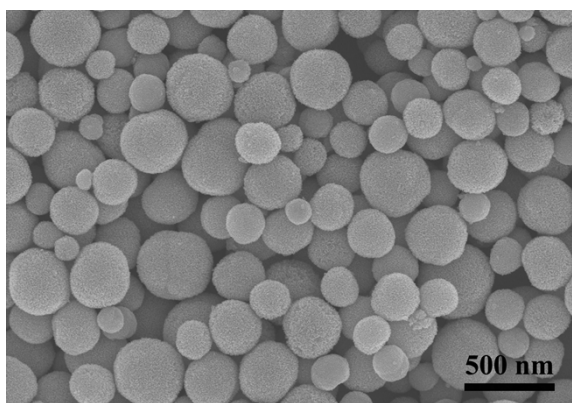

**Fig. S5** FESEM image of SnO<sub>2</sub> spheres.

## References

- S1 C. Prasittichai and J. T. Hupp, *J. Phys. Chem. Lett.*, 2010, **1**, 1611–1615.
- S2 A. Kay and M. Grätzel, *Chem. Mater.*, 2002, **14**, 2930–2935.
- S3 K. A. T. A. Perera, S. G. Anuradha, G. R. A. Kumara, M. L. Paranawitharana, R. M. G. Rajapakse and H. M. N. Bandara, *Electrochim. Acta*, 2011, **56**, 4135–4138.
- S4 P. Docampo, P. Tiwana, N. Sakai, H. Miura, L. Herz, T. Murakami and H. J. Snaith, *J. Phys. Chem. C*, 2012, **116**, 22840–22846.
- S5 M. K. I. Senevirathna, P. K. D. D. P. Pitigala, E. V. A. Premalal, K. Tennakone, G. R. A. Kumara and A. Konno, *Sol. Energy Mater. Sol. Cells*, 2007, **91**, 544–547.
- S6 S. Gubbala, V. Chakrapani, V. Kumar and M. K. Sunkara, *Adv. Funct. Mater.*, 2008, **18**, 2411–2418.
- S7 R. Kasaudhan, H. Elbohy, S. Sigdel, H. Qiao, Q. Wei and Q. Qiao, *IEEE Electron. Device Lett.*, 2014, **35**, 578–580.
- S8 C. Gao, X. Li, B. Lu, L. Chen, Y. Wang, F. Teng, J. Wang, Z. Zhang, X. Pan and E. Xie, *Nanoscale*, 2012, **4**, 3475–3481.
- S9 H. Niu, S. Zhang, R. Wang, Z. Guo, X. Shang, W. Gan, S. Qin, L. Wan and J. Xu, *J. Phys. Chem. C*, 2014, **118**, 3504–3513.
- S10 J. Qian, P. Liu, Y. Xiao, Y. Jiang, Y. Cao, X. Ai and H. Yang, *Adv. Mater.*, 2009, **21**, 3663–3667.
- S11 H. Wang, B. Li, J. Gao, M. Tang, H. Feng, J. Li and L. Guo, *CrystEngComm*, 2012, **14**, 5177–5181.
- S12 P. Zhu, M. V. Reddy, Y. Wu, S. Peng, S. Yang, A. S. Nair, K. P. Loh, B. V. R. Chowdari and S. Ramakrishna, *Chem. Commun.*, 2012, **48**, 10865–10867.
- S13 Y.-F. Wang, K.-N. Li, C.-L. Liang, Y.-F. Hou, C.-Y. Su and D.-B. Kuang, *J. Mater. Chem.*, 2012, **22**, 21495–21501.
- S14 H. Pang, H. Yang, C. X. Guo and C. M. Li, *ACS Appl. Mater. Interfaces*, 2012, **4**, 6261–6265.
- S15 X. Dou, D. Sabba, N. Mathews, L. H. Wong, Y. M. Lam and S. Mhaisalkar, *Chem. Mater.*, 2011, **23**, 3938–3945.
- S16 Y. Duan, J. Zheng, N. Fu, Y. Fang, T. Liu, Q. Zhang, X. Zhou, Y. Lin and F. Pan, *J. Mater. Chem. A*, 2015, DOI: 10.1039/C4TA05923A.
